# Supplementary material
Source: MDPI journal article supplement (https://www.mdpi.com/2071-1050/14/5/2868)
Supplement: s1 [file s1 › sustainability-1582327-supplementary.pdf]

## QAD-Fit

Here you may find some statements regarding Performance-Enhancing Substances (PES) consumption in fitness. Please read each statement carefully and mark with an “X” the corresponding answer. "Performance-enhancing substances" are substances specifically taken for the purpose of improving physical appearance and increase performance in the practice of physical activity, excluding nutritional supplements.

|                                                                                                              | Totally disagree | Disagree | Partially disagree | No opinion | Partially agree | Agree | Totally agree |
|--------------------------------------------------------------------------------------------------------------|------------------|----------|--------------------|------------|-----------------|-------|---------------|
|                                                                                                              | 1                | 2        | 3                  | 4          | 5               | 6     | 7             |
| 1. I would take PES to achieve my goals in the practice of physical activity.                                |                  |          |                    |            |                 |       |               |
| 2. When a practitioner qualifies himself in competition due to the intake of PES, he should be disqualified. |                  |          |                    |            |                 |       |               |
| 3. Selling PES should be punished.                                                                           |                  |          |                    |            |                 |       |               |
| 4. To get the physical appearance I desire I would take PES.                                                 |                  |          |                    |            |                 |       |               |
| 5. Performance enhancing substances help to improve physical abilities.                                      |                  |          |                    |            |                 |       |               |
| 6. To increase my physical abilities, I would take PES.                                                      |                  |          |                    |            |                 |       |               |
| 7. To have a perfect physique, I would take PES.                                                             |                  |          |                    |            |                 |       |               |
| 8. The consumption of PES helps to develop self-confidence.                                                  |                  |          |                    |            |                 |       |               |
| 9. I would take PES, if most people I know approved of it.                                                   |                  |          |                    |            |                 |       |               |
| 10. To achieve a targeted goal, I would take PES.                                                            |                  |          |                    |            |                 |       |               |
| 11. Instructors who give PES to their practitioners should be punished.                                      |                  |          |                    |            |                 |       |               |
| 12. Consuming PES enhances the well-being of practitioners.                                                  |                  |          |                    |            |                 |       |               |
| 13. Consuming PES is a form of cheating.                                                                     |                  |          |                    |            |                 |       |               |
| 14. To be admired physically, I would take PES.                                                              |                  |          |                    |            |                 |       |               |
| 15. A practitioner must achieve his goals on his own, rather than with the help of PES.                      |                  |          |                    |            |                 |       |               |
| 16. To physically please others, I would take PES.                                                           |                  |          |                    |            |                 |       |               |

**Thank you.**
